# Supplementary material for: Design and synthesis of high performance LiFePO4/C nanomaterials for lithium ion batteries assisted by a facile H+/Li+ion exchange reaction
Source: Royal Society of Chemistry journal article supplement (doi:10.1039/c5ta00178a), 2015-01-01
Supplement: c5ta00178a1.pdf [file c5ta00178a1.pdf]

## Supporting Information

### **Design and synthesis of high performance LiFePO<sub>4</sub>/C nanomaterial for lithium ion batteries assisted by a facile H<sup>+</sup>/Li<sup>+</sup> ion exchange**

*Hongbin Wang,<sup>a</sup> Lijia Liu,<sup>a</sup> Runwei Wang,<sup>a</sup> Daliang Zhang,<sup>a</sup> Liangkui Zhu,<sup>a</sup> Shilun Qiu,<sup>a</sup> Yingjin Wei,<sup>b</sup> Xu Jin,<sup>c</sup> and Zongtao Zhang<sup>a,b,\*</sup>*

<sup>a</sup> State Key Laboratory of Inorganic Synthesis and Preparative Chemistry, Jilin University, Changchun, 130012, P. R. China

<sup>b</sup> Key Laboratory of Physics and Technology for Advanced Batteries (Ministry of Education), Jilin University, Changchun 130012, P. R. China

<sup>c</sup> Research Institute of Petroleum Exploration and Development, PetroChina, Beijing 100083, P. R. China

Corresponding Author

\*E-mail: zzhang@jlu.edu.cn.

## Supplementary Figures

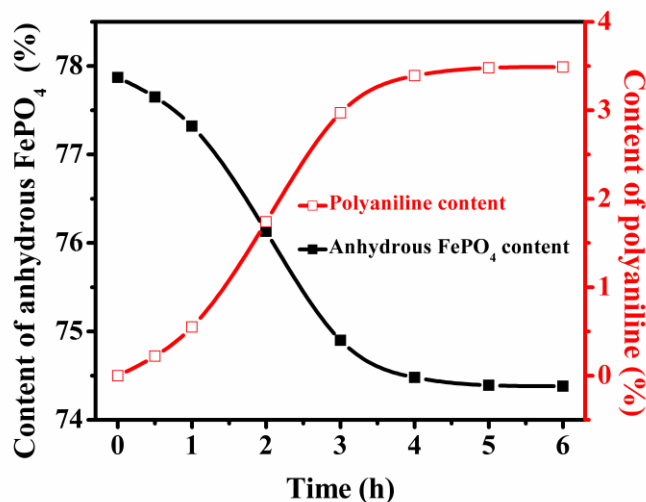

**Figure S1.** The mass content curves of time-consumed test for anhydrous FePO<sub>4</sub> and polyaniline in FePO<sub>4</sub>-PANI nanocomposites aging for different times (0-6 h).

In the beginning (aging for 0 h), the visible precipitate could be totally regarded as hydrated FePO<sub>4</sub>, as polyaniline barely appeared at this moment. According to result of TG test, the content of anhydrous FePO<sub>4</sub> in the hydrated FePO<sub>4</sub> is 77.87 wt. %, indicating that the chemical formula of hydrated FePO<sub>4</sub> should be accurately described as FePO<sub>4</sub> 2.384H<sub>2</sub>O. After aging for 5 h, the content of anhydrous FePO<sub>4</sub> fell to 74.39 wt. %. Assuming that one proton per hydrated FePO<sub>4</sub> formula unit has been replaced by Li<sup>+</sup>, the thermal decomposition procedures of as-synthesized FePO<sub>4</sub>-PANI and Li-FePO<sub>4</sub>-PANI nanocomposites can be theoretically described as follows:

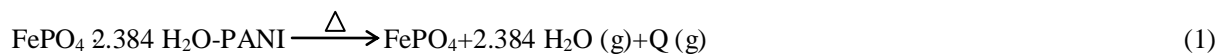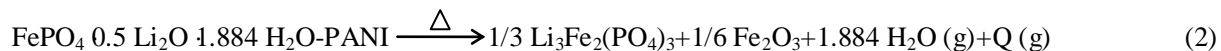

Here, Q represents the gas decomposition products of polyaniline. According to the Equation (1), the content (x) of polyaniline can be calculated by the following formula:

$$\frac{M(\text{FePO}_4)}{M(\text{FePO}_4) + 2.384 M(\text{H}_2\text{O})} \times (1-x) = 74.39 \%$$

where M (A) represents the molar mass of A. Thus the newly formed polyaniline accounts for 4.47 wt. % of FePO<sub>4</sub>-PANI. Analogously, based on Equation (2), theoretical weight loss (y) of Li-FePO<sub>4</sub>-PANI was calculated to be 20.68 wt. % by the following formula:

$$\frac{1/3 M(\text{Li}_3\text{Fe}_2(\text{PO}_4)_3) + 1/6 M(\text{Fe}_2\text{O}_3)}{1/3 M(\text{Li}_3\text{Fe}_2(\text{PO}_4)_3) + 1/6 M(\text{Fe}_2\text{O}_3) + 1.884 M(\text{H}_2\text{O})} \times (1 - 4.47 \%) = (1 - y)$$

Hence, considering known total weight loss (25.61 wt. %) of FePO<sub>4</sub>-PANI, the theoretical weight loss of Li-FePO<sub>4</sub>-PANI should be 4.93 wt. % lower than that of FePO<sub>4</sub>-PANI.

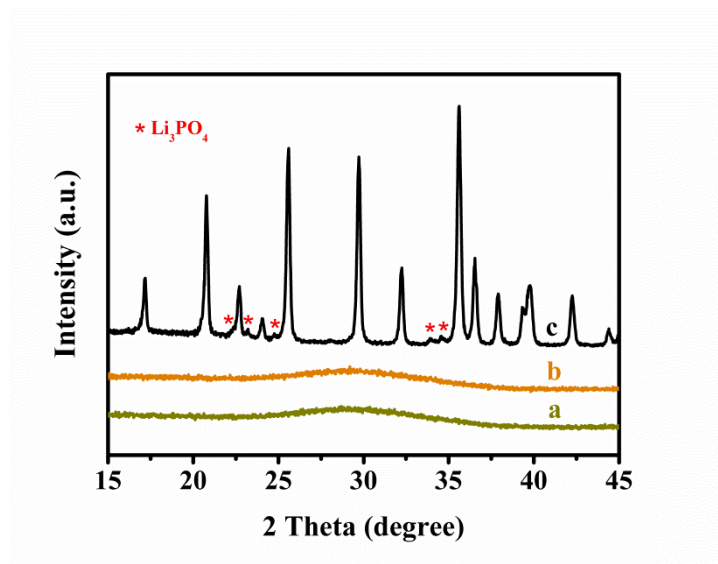

**Figure S2.** XRD patterns of a) pure hydrated  $\text{FePO}_4$  (lack of PANI), b)  $\text{Li-FePO}_4$  ( $\text{H}^+/\text{Li}^+$  ion exchange for 2 h), c)  $\text{LiFePO}_4/\text{C}$  material containing  $\text{Li}_3\text{PO}_4$  impurity synthesized from  $\text{Li-FePO}_4$  intermediate.

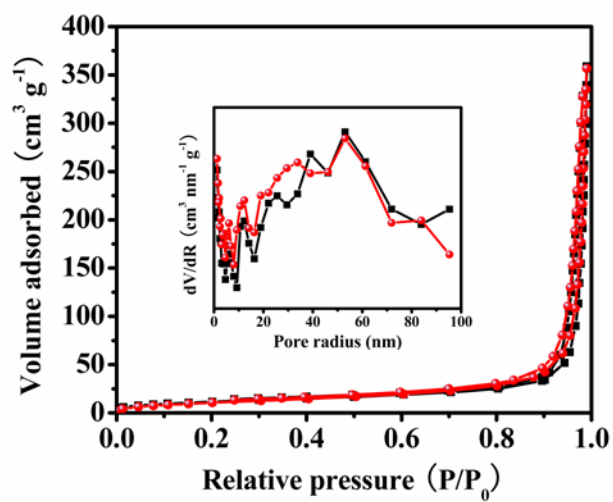

**Figure S3.** N<sub>2</sub> absorption-desorption isotherms of (dark) FePO<sub>4</sub>-PANI and (red) Li-FePO<sub>4</sub>-PANI nanocomposites. Inset shows corresponding pore size distributions.

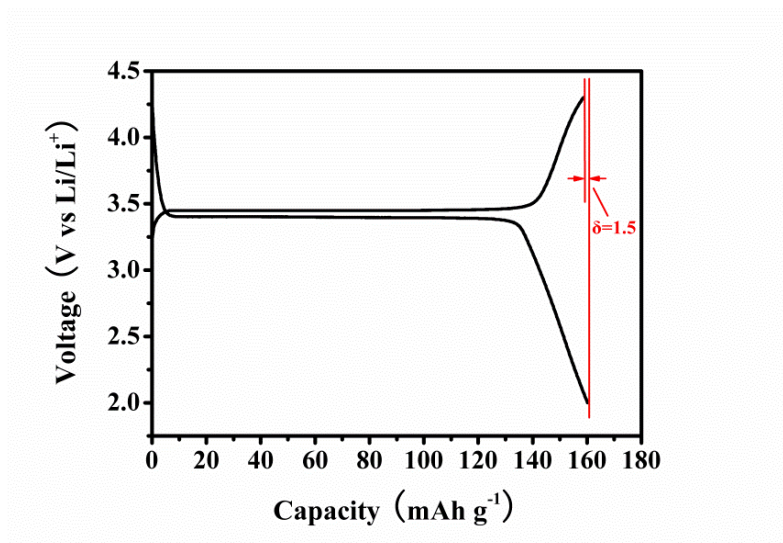

**Figure S4.** First charge and discharge curves of  $\text{LiFePO}_4/\text{C}$  nanomaterial tested at 0.2 C rate. The capacity in initial charge is found to be  $1.5 \text{ mAh g}^{-1}$  lower than that of discharge, reflecting a slight deficiency of Li in  $\text{LiFePO}_4/\text{C}$  nanomaterial, which can be interpreted as thermal evaporation of  $\text{Li}_2\text{O}$  during sintering at elevated temperature.

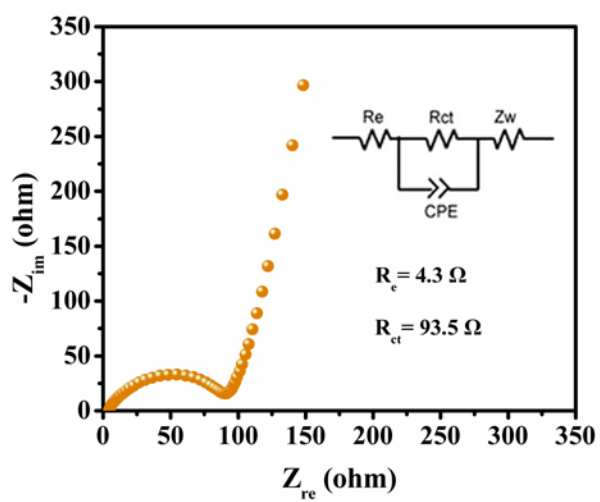

**Figure S5.** Nyquist plots of commercial  $\text{LiFePO}_4/\text{C}$  nanomaterial performed at open circuit voltage (OCV) after three cycles of activation. Inset shows the equivalent circuit and corresponding fitted values of ohmic resistance ( $R_e$ ) and charge transfer resistance ( $R_{ct}$ ).

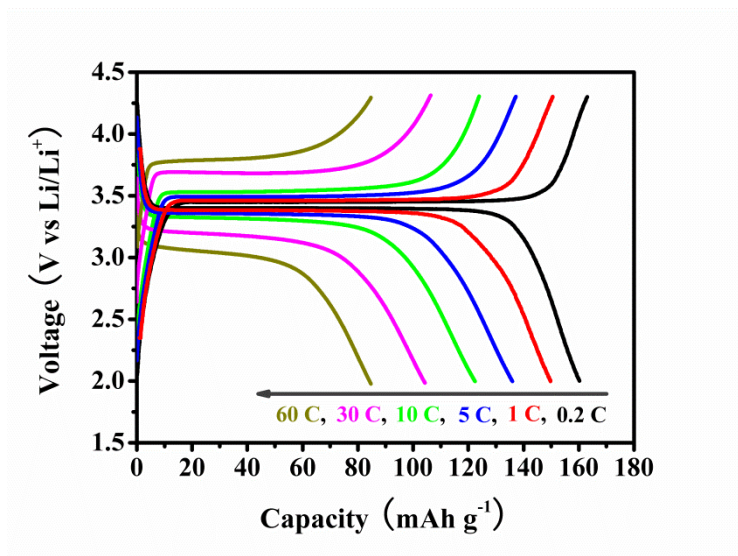

**Figure S6.** Galvanostatic charge-discharge curves of LiFePO<sub>4</sub>/C nanomaterial at various rates tested with a relatively higher mass loading of  $\sim 5 \text{ mg cm}^{-2}$ . Accordingly, the capacities are determined to be 160.2, 149.7, 135.9, 122.4, 104.3 and 84.7 mAh g<sup>-1</sup> when discharging at 0.2 C, 1 C, 5 C, 10 C, 30 C and 60 C respectively.
